# Supplementary material
Source: Springer Nature journal article supplement (https://www.springermedizin.de/resource/supplementary/13046_2009_179_MOESM7_ESM.pdf/9661800)

### Epithelioid

### Sarcomatoid

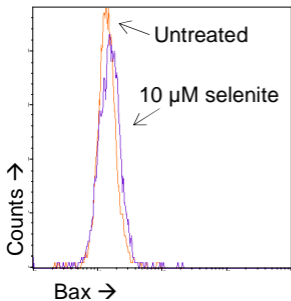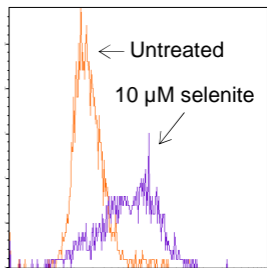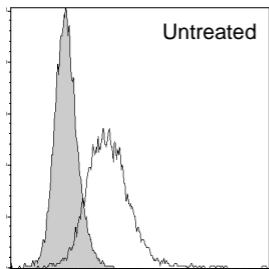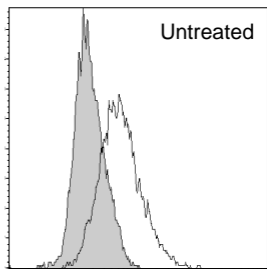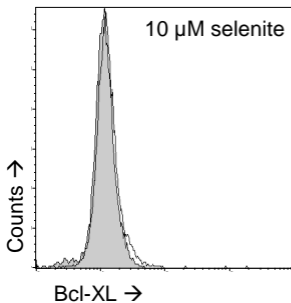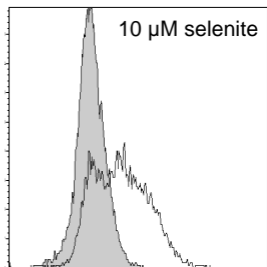

Supplement: MOESM7 [file 9661800]
